# Supplementary material for: Synthesis of photoresponsive and photoemissive ultrathin 2D nanosheets of In2S3 achieved through a new single source molecular precursor
Source: Royal Society of Chemistry journal article supplement (doi:10.1039/d2ra05000e), 2022-01-01
Supplement: d2ra05000e1.pdf [file d2ra05000e1.pdf]

## Supplementary Information

### Synthesis of Photo-responsive and Photoluminescent In<sub>2</sub>S<sub>3</sub> ultrathin nanosheets achieved through a new single source molecular precursor

Gourab Karmakar,<sup>a,b</sup> Adish Tyagi,<sup>\*a,b</sup> Alpa Y. Shah,<sup>a</sup> Liladhar B. Kumbhare,<sup>a</sup> A. P. Wadawale,<sup>a</sup> G. Kedarnath,<sup>\*a,b</sup> Vishal Singh<sup>c</sup>

<sup>a</sup>Chemistry Division, Bhabha Atomic Research Centre, Mumbai- 400 085 (India),

<sup>b</sup>Homi Bhabha National Institute, Anushaktinagar, Mumbai- 400 094 (India)

<sup>c</sup>Materials Science Division, Bhabha Atomic Research Centre, Mumbai- 400 085 (India).

Email: [tyagia@barc.gov.in](mailto:tyagia@barc.gov.in), [kedar@barc.gov.in](mailto:kedar@barc.gov.in)

#### Determination of band gap from Brus equation

The Brus equation is given by<sup>1</sup>

$$E_{np} \approx E_{g(0)} + \frac{\hbar^2 \pi^2}{2r^2} \left( \frac{1}{m_e^*} + \frac{1}{m_h^*} \right) - \frac{1.8e^2}{4\pi\epsilon R}$$

where  $E_{np}$  is the bandgap of the NSs,  $E_g$  is the band gap of bulk In<sub>2</sub>S<sub>3</sub> (2.2 eV),  $\hbar = h/2\pi$  is the reduced Planck constant,  $e$  is the electron charge,  $m_e^*$  is the effective mass of electron,  $m_h^*$  is the effective mass of hole,  $m_e^* = m_h^* (0.25 \times 10^{-28} \text{ g})$ ,  $r$  is the average crystallite size of the NSs and  $\epsilon$  is the dielectric constant ( $\epsilon = 11$ ). Putting all the values, the direct band gap of the ultrathin In<sub>2</sub>S<sub>3</sub> NSs comes out to be  $\sim 2.51$  eV.

#### Calculation of exciton Bohr radius of In<sub>2</sub>S<sub>3</sub>

The Bohr radius of the exciton in In<sub>2</sub>S<sub>3</sub> can be calculated by the following equation<sup>2</sup>

$$r_B = \frac{\hbar^2 \epsilon}{e^2} \left( \frac{1}{m_e} + \frac{1}{m_h} \right)$$

where  $\epsilon$  is the dielectric constant ( $\sim 11$ ),  $\hbar$  is the Planck constant and  $m_e$  and  $m_h$  are the electron and hole effective mass, respectively.  $m_e = m_h = \mu = 0.25 \times 10^{-28} \text{ g}$ . From these data, Bohr radius of the exciton in In<sub>2</sub>S<sub>3</sub> is calculated to be 33.6 nm.

## Figure Captions:

**Fig. S1.** Molecular structure of  $\text{In}[\text{Me}_2\text{NCH}(\text{Me})\text{CH}_2\text{S}]_2\text{Cl}$  (**1**) showing envelop conformation of the ligands.

**Fig. S2.** Thermogravimetric analysis of  $\text{In}[\text{Me}_2\text{NCH}(\text{Me})\text{CH}_2\text{S}]_2\text{Cl}$  (**1**)

**Fig. S3.** EDS analysis of  $\text{In}_2\text{S}_3$  NSs synthesized from  $\text{In}[\text{Me}_2\text{NCH}(\text{Me})\text{CH}_2\text{S}]_2\text{Cl}$  (**1**) at  $150^\circ\text{C}$  for 1 minute.

**Fig. S4.** XPS survey scan of  $\text{In}_2\text{S}_3$  NSs synthesized from  $\text{In}[\text{Me}_2\text{NCH}(\text{Me})\text{CH}_2\text{S}]_2\text{Cl}$  (**1**) at  $150^\circ\text{C}$  for 1 minute.

**Fig. S5.** 2D elemental mapping of  $\text{In}_2\text{S}_3$  NSs synthesized from  $\text{In}[\text{Me}_2\text{NCH}(\text{Me})\text{CH}_2\text{S}]_2\text{Cl}$  (**1**) at  $150^\circ\text{C}$  for 1 minute.

**Fig. S6.** I-V characteristics of the  $\text{In}_2\text{S}_3$  NSs synthesized from  $\text{In}[\text{Me}_2\text{NCH}(\text{Me})\text{CH}_2\text{S}]_2\text{Cl}$  (**1**) at  $150^\circ\text{C}$  for 1 minute.

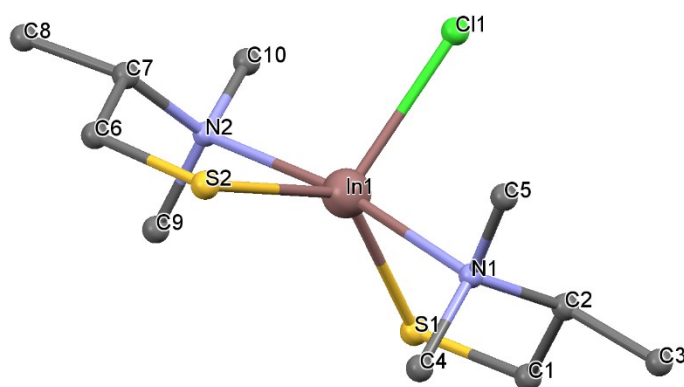

**Fig. S1.** Molecular structure of  $\text{In}[\text{Me}_2\text{NCH}(\text{Me})\text{CH}_2\text{S}]_2\text{Cl}$  (**1**) showing envelop conformation of the ligands.

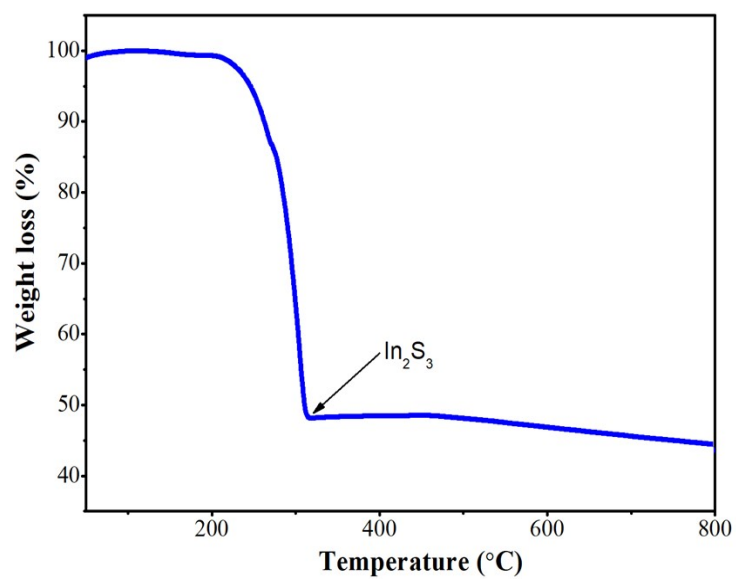

**Fig. S2.** Thermogravimetric analysis of  $\text{In}[\text{Me}_2\text{NCH}(\text{Me})\text{CH}_2\text{S}]_2\text{Cl}$  (**1**)

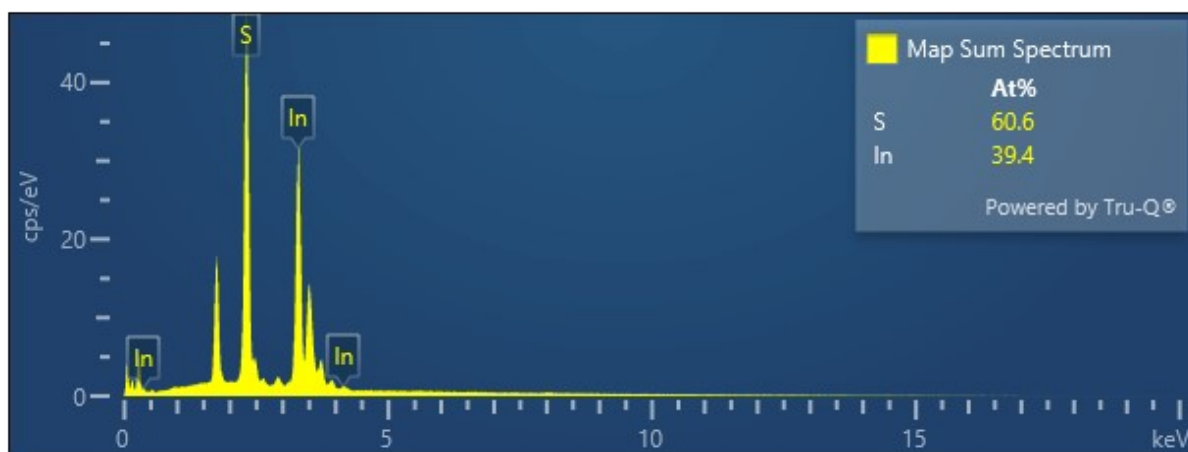

**Fig. S3.** EDS analysis of  $\text{In}_2\text{S}_3$  NSs synthesized from  $\text{In}[\text{Me}_2\text{NCH}(\text{Me})\text{CH}_2\text{S}]_2\text{Cl}$  (**1**) at 150°C for 1 minute.

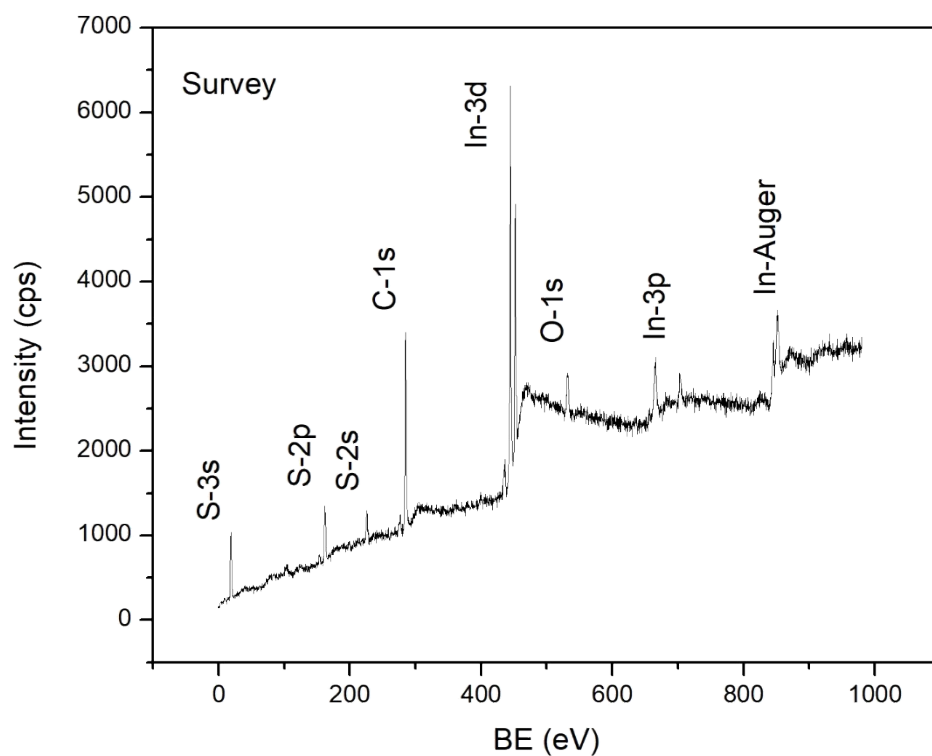

**Fig. S4.** XPS survey scan of  $\text{In}_2\text{S}_3$  NSs synthesized from  $\text{In}[\text{Me}_2\text{NCH}(\text{Me})\text{CH}_2\text{S}]_2\text{Cl}$  (**1**) at  $150^\circ\text{C}$  for 1 minute.

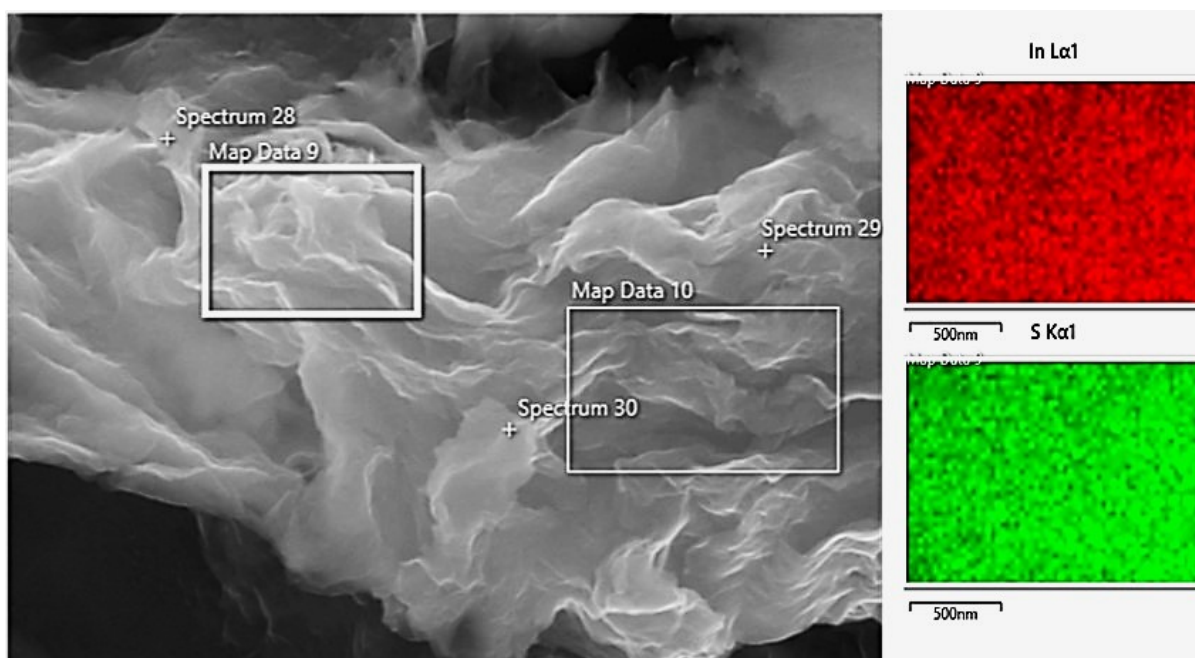

**Fig. S5.** 2D elemental mapping of  $\text{In}_2\text{S}_3$  NSs synthesized from  $\text{In}[\text{Me}_2\text{NCH}(\text{Me})\text{CH}_2\text{S}]_2\text{Cl}$  (**1**) at  $150^\circ\text{C}$  for 1 minute.

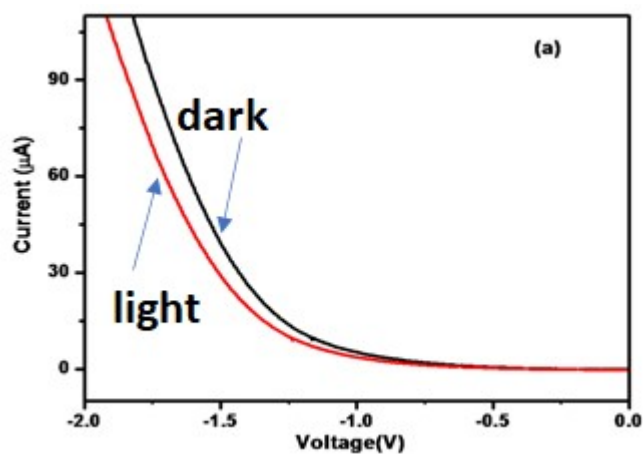

**Fig. S6.** I-V characteristics of the  $\text{In}_2\text{S}_3$  NSs synthesized from  $\text{In}[\text{Me}_2\text{NCH}(\text{Me})\text{CH}_2\text{S}]_2\text{Cl}$  (**1**) at  $150^\circ\text{C}$  for 1 minute.

### References:

1. R. Li, L. Tang, Q. Zhao, T. H. Ly, K. S. Teng, Y. Li, Y. Hu, C. Shu and S. P. Lau, *Nanoscale Res. Lett.*, 2019, **14**, 161.
2. W. Chen, J.-O. Bovin, A. G. Joly, S. Wang, F. Su and G. Li, *J. Phys. Chem. B*, 2004, **108**, 11927-11934.
